# Supplementary material
Source: publisher figshare collection journal article supplement (https://springernature.figshare.com/ndownloader/files/21517113)
Supplement: Supplementary file 1 [file 21517113]

Supplementary Table 10: miRNA targeting the mined genes within the three major QTL clusters

| miRNA_Acc. | Target_Acc. | Expectation | miRNA_start | miRNA_end | Target_start | Target_end | miRNA_aligned_fragment | Target_aligned_fragment | Inhibition |
| --- | --- | --- | --- | --- | --- | --- | --- | --- | --- |
| ghr-miR156a | Gh_A05G3285 | 4.5 | 1 | 20 | 255 | 274 | UGACAGAAGAGAGUGAGCAC | AAGUUUAUUCCUUUCUGUUA | Translation |
| ghr-miR156b | Gh_A05G3285 | 4.5 | 1 | 20 | 255 | 274 | UGACAGAAGAGAGUGAGCAC | AAGUUUAUUCCUUUCUGUUA | Translation |
| ghr-miR156c | Gh_D01G0187 | 4 | 1 | 20 | 1400 | 1419 | UGUCAGAAGAGAGUGAGCAC | GUGAUAAUUUUCUUCUGAUG | Cleavage |
| ghr-miR156d | Gh_A05G3285 | 4.5 | 1 | 20 | 255 | 274 | UGACAGAAGAGAGUGAGCAC | AAGUUUAUUCCUUUCUGUUA | Translation |
| ghr-miR160 | Gh_D01G0223 | 4.5 | 1 | 21 | 428 | 448 | UAUGAGGAGCCAUGCAUGUAU | CUACAUUCAUAGCUUCUGAUG | Translation |
| ghr-miR164 | Gh_D01G0205 | 5 | 1 | 21 | 1027 | 1047 | UGGAGAAGCAGGGCACGUGCA | GAGAUGUACCUAGCUUCUCUG | Translation |
| ghr-miR166b | Gh_A01G1943 | 4 | 1 | 21 | 410 | 430 | UCGGACCAGGCUUCAUUCCCC | UAGGAAGAAAGCUUGGUUUGG | Cleavage |
| ghr-miR167a | Gh_A05G3287 | 4.5 | 1 | 21 | 1392 | 1412 | UGAAGCUGCCAGCAUGAUCUA | CCGAACAUUUUGGCAUCUUUA | Cleavage |
| ghr-miR167b | Gh_A05G3287 | 4.5 | 1 | 21 | 1392 | 1412 | UGAAGCUGCCAGCAUGAUCUA | CCGAACAUUUUGGCAUCUUUA | Cleavage |
| ghr-miR172 | Gh_D01G0210 | 3.5 | 1 | 21 | 26 | 46 | AGAAUCCUGAUGAUGCUGCAG | UGGCAGCAUCGUCAGCAUGCU | Cleavage |
| ghr-miR2948-5p | Gh_D01G0205 | 4.5 | 1 | 22 | 172 | 193 | UGUGGGAGAGUUGGGCAAGAAU | AUUCUUCAACAAUUCUCCCAUG | Cleavage |
| ghr-miR2949a-3p | Gh_D01G0190 | 3.5 | 1 | 21 | 2002 | 2022 | UGCAAAUCCAGUCAAAAGUUA | AUCCUUUUGACUGGAUUGGCU | Cleavage |
| ghr-miR2949a-5p | Gh_D01G0233 | 4 | 1 | 22 | 2442 | 2463 | ACUUUUGAACUGGAUUUGCCGA | ACUGCAAAAUCAAUUAAAAAGU | Translation |
| ghr-miR2949b | Gh_D01G0231 | 4 | 1 | 22 | 123 | 144 | UCUUUUGAACUGGAUUUGCCGA | AACGCAGAUUUGGGUCAAGAGG | Translation |
| ghr-miR2949c | Gh_D01G0231 | 4 | 1 | 22 | 123 | 144 | UCUUUUGAACUGGAUUUGCCGA | AACGCAGAUUUGGGUCAAGAGG | Translation |
| ghr-miR2950 | Gh_A01G1774 | 5 | 1 | 21 | 1026 | 1046 | UGGUGUGCAGGGGGUGGAAUA | UUAUUCAACUCCUGCAUUCCA | Cleavage |
| ghr-miR3476-3p | Gh_D01G0223 | 4 | 1 | 21 | 473 | 493 | AGCCAACAACAUCAGUUCUAA | GGGGAACCGAUGUUGAUGGCC | Cleavage |
| ghr-miR3476-5p | Gh_A01G1948 | 4.5 | 1 | 21 | 529 | 549 | UGAACUGGGUUUGUUGGCUGC | GAAGCAAUCAAAUCUGGUUUG | Cleavage |
| ghr-miR390a | Gh_D01G0210 | 3.5 | 1 | 21 | 400 | 420 | AAGCUCAGGAGGGAUAGCGCC | GAAGCUGUCUCUCCUGAGUUG | Cleavage |
| ghr-miR390b | Gh_D01G0210 | 3.5 | 1 | 21 | 400 | 420 | AAGCUCAGGAGGGAUAGCGCC | GAAGCUGUCUCUCCUGAGUUG | Cleavage |
| ghr-miR390c | Gh_D01G0210 | 3.5 | 1 | 21 | 400 | 420 | AAGCUCAGGAGGGAUAGCGCC | GAAGCUGUCUCUCCUGAGUUG | Cleavage |
| ghr-miR393 | Gh_A05G2522 | 4.5 | 1 | 22 | 356 | 376 | UCCAAAGGGAUCGCAUUGAUCU | UGAUUAAUG-GUUCUCUUUGGG | Translation |
| ghr-miR394a | Gh_D01G0229 | 4 | 1 | 20 | 402 | 421 | UUGGCAUUCUGUCCACCUCC | CGAGGUGGACAUAGCGCUGA | Translation |
| ghr-miR394b | Gh_D01G0229 | 4 | 1 | 20 | 402 | 421 | UUGGCAUUCUGUCCACCUCC | CGAGGUGGACAUAGCGCUGA | Translation |
| ghr-miR396a | Gh_A01G1939 | 4 | 1 | 21 | 1207 | 1227 | UUCCACAGCUUUCUUGAACUG | CAAUUCAAGAAAGCAGUCGAA | Cleavage |
| ghr-miR396b | Gh_A01G1939 | 4 | 1 | 21 | 1207 | 1227 | UUCCACAGCUUUCUUGAACUG | CAAUUCAAGAAAGCAGUCGAA | Cleavage |
| ghr-miR398 | Gh_D01G0187 | 3.5 | 1 | 21 | 1484 | 1504 | UGUGUUCUCAGGUCACCCCUU | AAGGGCUGGGCUUAGAACACA | Translation |
| ghr-miR399c | Gh_D01G0190 | 4.5 | 1 | 21 | 1201 | 1221 | UGCCAAAGGAGAGUUGGCCUU | UUGGCCUUCACUUCUUUGGCU | Cleavage |
| ghr-miR399d | Gh_D01G0226 | 4.5 | 1 | 21 | 847 | 867 | UGCCAAAGGAGAUUUGCCCUG | GAGGUGACAUCUACUUUGGUA | Translation |
| ghr-miR399e | Gh_D01G0186 | 5 | 1 | 21 | 845 | 865 | UGCCAAAGGAGAUUUGCCCCG | AUGGUCGAAUCUGGUUUGACA | Translation |
| ghr-miR479 | Gh_A05G2519 | 5 | 1 | 22 | 1793 | 1814 | CGUGAUAUUGGUUCGGCUCAUC | CUGGAGUAGAGGCAAUGUCAUU | Translation |
| ghr-miR482a | Gh_D01G0174 | 5 | 1 | 22 | 1555 | 1575 | UCUUUCCUACUCCUCCCAUACC | AUCAUUGAAGGAG-AGGAGGGA | Translation |
| ghr-miR482b | Gh_D01G0187 | 5 | 1 | 22 | 670 | 691 | UCUUGCCUACUCCACCCAUGCC | UGGAUUGGUGGGGCAGCCAAGC | Translation |
| ghr-miR7484a | Gh_A01G1935 | 4.5 | 1 | 24 | 2008 | 2031 | UUUGUAUAUUAGAUCAAAGAGCAA | GGAAGCUUCGGUUCUGUAUACAAA | Translation |
| ghr-miR7484b | Gh_A01G1935 | 4.5 | 1 | 24 | 2008 | 2031 | UUUGUAUAUUAGAUCAAAGAGCAA | GGAAGCUUCGGUUCUGUAUACAAA | Translation |
| ghr-miR7485 | Gh_A01G1943 | 5 | 1 | 24 | 1753 | 1776 | AAAGACAUCUUUGAAUUCUUGGAG | ACUGCAGAAUUCAGAGAGGUUUCA | Cleavage |
| ghr-miR7486a | Gh_D01G0235 | 4.5 | 1 | 24 | 2395 | 2418 | AAGGAAGCGCUUUGUCCACGUGGA | AGAUGGUGGAGAAAACUUUUCCUG | Translation |
| ghr-miR7486b | Gh_D01G0235 | 4.5 | 1 | 24 | 2395 | 2418 | AAGGAAGCGCUUUGUCCACGUGGA | AGAUGGUGGAGAAAACUUUUCCUG | Translation |
| ghr-miR7487 | Gh_D01G0188 | 5 | 1 | 24 | 135 | 158 | AUACUCUUAUAGGACACUUGUUAA | UUUUCGAGAGUUUUCGAGGAGUAU | Translation |
| ghr-miR7488 | Gh_D01G0225 | 4 | 1 | 21 | 303 | 323 | UUUUGAGUACAGGGGACAAAA | UGUUGUCCCUGUUGUUCAAGA | Translation |
| ghr-miR7489 | Gh_D01G0233 | 4.5 | 1 | 24 | 463 | 486 | AUUGUUGCCAAUACAGGAGAACGU | UUCAGCCCUAGUAUUGCCAGCAGU | Cleavage |
| ghr-miR7491 | Gh_A01G1943 | 4 | 1 | 24 | 307 | 330 | UGGGAUCUUCGAGAGGAUUGAGCC | UGCAUCAUUCCUUCGAAGGUUCCA | Cleavage |
| ghr-miR7492a | Gh_A01G1939 | 4 | 1 | 23 | 11 | 34 | CUAUAGAAC-AUGAUCUUUAGCGG | UUUGUAAAGAUUGUUGUUUUAUGG | Translation |
| ghr-miR7492b | Gh_A01G1939 | 4 | 1 | 23 | 11 | 34 | CUAUAGAAC-AUGAUCUUUAGCGG | UUUGUAAAGAUUGUUGUUUUAUGG | Translation |
| ghr-miR7492c | Gh_A01G1939 | 4 | 1 | 23 | 11 | 34 | CUAUAGAAC-AUGAUCUUUAGCGG | UUUGUAAAGAUUGUUGUUUUAUGG | Translation |
| ghr-miR7493 | Gh_D01G0175 | 4 | 1 | 24 | 1393 | 1416 | AAUAUUUUAAUAAUUCAAUCGUCA | GAGCAUUUAAAUUAUUUGAAUGUU | Cleavage |
| ghr-miR7494 | Gh_D01G0235 | 4 | 1 | 23 | 1706 | 1728 | AGCUUGUGGACUAGUUUUAACAA | GACAGAAUACUAUUACACAAGCU | Translation |
| ghr-miR7495a | Gh_D01G0197 | 4 | 1 | 21 | 15 | 34 | UUACUUUAGAUGUCUCCUUCA | UGAAGGAAAU-UCUAAAGUAG | Translation |
| ghr-miR7495b | Gh_D01G0197 | 4 | 1 | 21 | 15 | 34 | UUACUUUAGAUGUCUCCUUCA | UGAAGGAAAU-UCUAAAGUAG | Translation |
| ghr-miR7496a | Gh_D01G0208 | 5 | 1 | 24 | 556 | 579 | AUGACCAAAUUGAUAGAAUGUGUA | AGAUGUUUCUACCACUCUGGUCAG | Translation |
| ghr-miR7496b | Gh_D01G0208 | 5 | 1 | 24 | 556 | 579 | AUGACCAAAUUGAUAGAAUGUGUA | AGAUGUUUCUACCACUCUGGUCAG | Translation |
| ghr-miR7497 | Gh_D01G0234 | 3.5 | 1 | 23 | 172 | 194 | ACAUGUGGACUGUCAUAUGGGUU | AUCACAAUUGACAUUCCACGUGU | Translation |
| ghr-miR7498 | Gh_D01G0178 | 3 | 1 | 24 | 1706 | 1729 | AUGGUGACACAUGGUAGUCUCACA | CCACUGACUACCCUGUGUUACCUU | Cleavage |
| ghr-miR7499 | Gh_D01G0182 | 3.5 | 1 | 24 | 951 | 974 | AUAUAAUUUUCGGUUAAUUCGGUU | UACUAAAUUAAGUGAAAGUUAUCU | Cleavage |
| ghr-miR7500 | Gh_D01G0235 | 4.5 | 1 | 24 | 391 | 414 | AUCGAGUUAUUCGAGUUAAUCGAG | GAAAGUUACCUUGGAUCACUUGAG | Cleavage |
| ghr-miR7501 | Gh_D01G0192 | 4 | 1 | 24 | 309 | 332 | AUAUCUGAUUCUGACACGAAAAAA | AGGAUUCGUAUCUGAAUCGGAGAU | Cleavage |
| ghr-miR7502 | Gh_A05G2520 | 4.5 | 1 | 24 | 2442 | 2465 | UUUUUAACAGUAGAAAUGAAUGAA | UUCCAUCAUUGCUUCUAUUAAAGC | Translation |
| ghr-miR7503 | Gh_D01G0190 | 4 | 1 | 24 | 237 | 260 | AGAUCGAUGGCUGAACAAGUUAGA | UAACGCUCGUUUAGCGAUCGCUCU | Translation |
| ghr-miR7504a | Gh_A05G2519 | 5 | 1 | 24 | 1669 | 1692 | UAUGAAACUGUGAUUCCACGUCAU | GAUUGGUGGGAUCAAAAGUUUGUA | Translation |
| ghr-miR7504b | Gh_D01G0195 | 4 | 1 | 24 | 918 | 941 | AGGAGGAAAAAUCUGAUUUGUCAU | CUGGAAAAGAAGAUUUUUUGUCCU | Cleavage |
| ghr-miR7505 | Gh_D01G0208 | 5 | 1 | 21 | 631 | 651 | UUCAGAAACCAUCCCUUCCUU | GAGGGUGGGAAGGUUUCUAAU | Translation |
| ghr-miR7506 | Gh_D01G0185 | 5 | 1 | 24 | 974 | 997 | AUGUCUGGGACAUGGCGUUGGCAC | AAUUCGACGUCAAGUUCCCGACAC | Cleavage |
| ghr-miR7507 | Gh_D01G0190 | 4.5 | 1 | 24 | 1805 | 1828 | AAGGUAGUGAAGUAGGCAAUUGGG | UUUUAUUGGCUAUUUCACCACCAU | Cleavage |
| ghr-miR7508 | Gh_D01G0175 | 3.5 | 1 | 21 | 1043 | 1063 | CAAGAAAAGAAGUCGGGAGAG | AUCUCCAAACUUUGUUUCUUG | Cleavage |
| ghr-miR7509 | Gh_A05G2519 | 4.5 | 1 | 24 | 2533 | 2557 | UCAAAAGCACUU-UUUGACAGCAAU | UACAUUGUCAAAGAAGUGAUUUUGC | Cleavage |
| ghr-miR7510a | Gh_D01G0181 | 3.5 | 1 | 24 | 970 | 993 | AAGGUCAUGAUCUUUAGCGGCGUU | GGUGUCGUUUUGGAUCAUGAUCUU | Cleavage |
| ghr-miR7510b | Gh_D01G0207 | 3.5 | 1 | 23 | 1330 | 1351 | AAGAACAUGAUCUUUAGCGGCGU | GGAUUGAUAAAG-UCAUGUUCUU | Translation |
| ghr-miR7511 | Gh_D01G0175 | 3.5 | 1 | 24 | 1485 | 1508 | AGAAGUUUUGCAUGUGUAGCUGAG | UGCCAUUGAACAUGUAGGACUUCU | Cleavage |
| ghr-miR7512 | Gh_A05G3287 | 3.5 | 1 | 21 | 2121 | 2141 | UGCUACUUGUAGUUAUGCAUG | UGUGGAUAAUUAUCAGUGGCA | Cleavage |
| ghr-miR7513 | Gh_D01G0216 | 4 | 1 | 21 | 311 | 331 | AAUCAGCCAGGAAUCGUUUGA | AAAAGUCAUAUCUGGCUGGUU | Cleavage |
| ghr-miR7514 | Gh_D01G0208 | 5 | 1 | 24 | 408 | 431 | AUAAAGUGAUAAGUGAGAUCGUCU | AGGCUGUCUUCCUAAGCACUUUAC | Translation |
| ghr-miR827a | Gh_D01G0223 | 4 | 1 | 21 | 479 | 499 | UUAGAUGACCAUCAACAAACA | CCGAUGUUGAUGGCCAUCUGG | Cleavage |
| ghr-miR827b | Gh_D01G0223 | 4 | 1 | 21 | 479 | 499 | UUAGAUGACCAUCAACAAACA | CCGAUGUUGAUGGCCAUCUGG | Cleavage |
| ghr-miR827c | Gh_D01G0223 | 4 | 1 | 21 | 479 | 499 | UUAGAUGACCAUCAACAAACA | CCGAUGUUGAUGGCCAUCUGG | Cleavage |
